# Supplementary material for: Interplay of the Serine/Threonine-Kinase StkP and the Paralogs DivIVA and GpsB in Pneumococcal Cell Elongation and Division
Source: PLoS Genet. 2014 Apr 10;10(4):e1004275. doi: 10.1371/journal.pgen.1004275 (PMC3983041; doi:10.1371/journal.pgen.1004275)
Supplement: Table S3 — Strains and plasmids. (XLSX) [file pgen.1004275.s015.xlsx]

## Sheet: Feuil1
			Table S3
		Strain	Genotype and description	Reference
		S. pneumoniae strains
		R800	S. pneumoniae R6 derivative	Gift from JP Claverys, Toulouse France
		R1226	R800 rpsL1, cibABC::kan-rpsL; KanR, StrS	Gift from JP Claverys, Toulouse France
		R3676	R1501 derivative, comC::DcomC pbp2x::gfp-pbp2x	Gift from JP Claverys, Toulouse France
		R3677	R1501 derivative, comC::DcomC ftsW::ftsW-gfp	Gift from JP Claverys, Toulouse France
		Spn8	R800 rpsL1, phpP-stkP::kan-rpsL; KanR, StrS	(Fleurie et al., 2012)
		stkP-K42M	R800 rpsL1, stkP::stkP-K42M; StrR	(Fleurie et al., 2012)
		WT	R800 rpsL1; StrR	Gift from JP Claverys, Toulouse France
		WT divIVA-gfp	R800 rpsL1, divIVA::divIVA-gfp; StrR	This study
		WT divIVA-gfp ftsZ-rfp	R800 rpsL1, divIVA::divIVA-gfp ftsZ::ftsZ-rfp; StrR	This study
		WT gfp-gpsB	R800 rpsL1, gpsB::gfp-gpsB; StrR	This study
		WT gpsB-gfp	R800 rpsL1, gpsB::gpsB-gfp; StrR	This study
		WT PZn-gfp-gpsB	R800 rpsL1, bgaA::PZn-gfp-gpsB; StrR, TetR	This study
		WT ezrA-gfp	R800 rpsL1, ezrA::ezrA-gfp; StrR	This study
		WT ftsZ-gfp	R800 rpsL1, ftsZ::ftsZ-gfp; StrR	This study
		WT gfp-pbp2b	R800 rpsL1, pbp2b::gfp-pbp2b; StrR	This study
		WT gfp-pbp2b ftsZ-rfp	R800 rpsL1, pbp2b::gfp-pbp2b ftsZ::ftsZ-rfp; StrR	This study
		WT gfp-pbp2x	R800 rpsL1, pbp2x::gfp-pbp2x; StrR	This study
		WT gfp-pbp2x ftsZ-rfp	R800 rpsL1, pbp2x::gfp-pbp2x ftsZ::ftsZ-rfp; StrR	This study
		WT rodA-gfp	R800 rpsL1, rodA::rodA-gfp; StrR	This study
		WT rodA-gfp ftsZ-rfp	R800 rpsL1, rodA::rodA-gfp ftsZ::ftsZ-rfp; StrR	This study
		WT ftsW-gfp	R800 rpsL1, ftsW::ftsW-gfp; StrR	This study
		WT ftsW-gfp ftsZ-rfp	R800 rpsL1, ftsW::ftsW-gfp ftsZ::ftsZ-rfp; StrR	This study
		WT gfp-stkP	R800 rpsL1, stkP::gfp-stkP; StrR	(Fleurie et al., 2012)
		DgpsB	R800 rpsL1, DgpsB; StrR	This study
		DgpsB divIVA-gfp	R800 rpsL1, DgpsB divIVA::divIVA-gfp; StrR	This study
		DgpsB divIVA-gfp ftsZ-rfp	R800 rpsL1, DgpsB divIVA::divIVA-gfp ftsZ::ftsZ-rfp; StrR	This study
		DgpsB ezrA-gfp	R800 rpsL1, DgpsB ezrA::ezrA-gfp; StrR	This study
		DgpsB ftsZ-gfp	R800 rpsL1, DgpsB ftsZ::ftsZ-gfp; StrR	This study
		DgpsB gfp-pbp2b	R800 rpsL1, DgpsB pbp2b::gfp-pbp2b; StrR	This study
		DgpsB gfp-pbp2b ftsZ-rfp	R800 rpsL1, DgpsB pbp2b::gfp-pbp2b ftsZ::ftsZ-rfp; StrR	This study
		DgpsB gfp-pbp2x	R800 rpsL1, DgpsB pbp2x::gfp-pbp2x; StrR	This study
		DgpsB gfp-pbp2x ftsZ-rfp	R800 rpsL1, DgpsB pbp2x::gfp-pbp2x ftsZ::ftsZ-rfp; StrR	This study
		DgpsB rodA-gfp	R800 rpsL1, DgpsB rodA::rodA-gfp; StrR	This study
		DgpsB rodA-gfp ftsZ-rfp	R800 rpsL1, DgpsB rodA::rodA-gfp ftsZ::ftsZ-rfp; StrR	This study
		DgpsB ftsW-gfp	R800 rpsL1, DgpsB ftsW::ftsW-gfp; StrR	This study
		DgpsB ftsW-gfp ftsZ-rfp	R800 rpsL1, DgpsB ftsW::ftsW-gfp ftsZ::ftsZ-rfp; StrR	This study
		DgpsB gfp-stkP	R800 rpsL1, DgpsB stkP::gfp-stkP; StrR	This study
		DgpsB stkP-K42M	R800 rpsL1, DgpsB stkP::stkP-K42M; StrR	This study
		DdivIVA	R800 rpsL1, DdivIVA; StrR	This study
		DdivIVA PZn-gfp-gpsB	R800 rpsL1, DdivIVA bgaA::PZn-gfp-gpsB; StrR, TetR	This study
		DdivIVA ezrA-gfp	R800 rpsL1, DdivIVA ezrA::ezrA-gfp; StrR	This study
		DdivIVA ftsZ-gfp	R800 rpsL1, DdivIVA ftsZ::ftsZ-gfp; StrR	This study
		DdivIVA gfp-pbp2b	R800 rpsL1, DdivIVA pbp2b::gfp-pbp2b; StrR	This study
		DdivIVA gfp-pbp2x	R800 rpsL1, DdivIVA pbp2x::gfp-pbp2x; StrR	This study
		DdivIVA rodA-gfp	R800 rpsL1, DdivIVA rodA::rodA-gfp; StrR	This study
		DdivIVA ftsW-gfp	R800 rpsL1, DdivIVA ftsW::ftsW-gfp; StrR	This study
		DdivIVA gfp-stkP	R800 rpsL1, DdivIVA stkP::gfp-stkP; StrR	This study
		DdivIVA stkP-K42M	R800 rpsL1, DdivIVA stkP::stkP-K42M; StrR	This study
		DgpsBDdivIVA	R800 rpsL1, DgpsBDdivIVA; StrR	This study
		DgpsBDdivIVA ezrA-gfp	R800 rpsL1, DgpsBDdivIVA ezrA::ezrA-gfp; StrR	This study
		DgpsBDdivIVA ftsZ-gfp	R800 rpsL1, DgpsBDdivIVA ftsZ::ftsZ-gfp; StrR	This study
		DgpsBDdivIVA gfp-pbp2b	R800 rpsL1, DgpsBDdivIVA pbp2b::gfp-pbp2b; StrR	This study
		DgpsBDdivIVA gfp-pbp2x	R800 rpsL1, DgpsBDdivIVA pbp2x::gfp-pbp2x; StrR	This study
		DgpsBDdivIVA rodA-gfp	R800 rpsL1, DgpsBDdivIVA rodA::rodA-gfp; StrR	This study
		DgpsBDdivIVA ftsW-gfp	R800 rpsL1, DgpsBDdivIVA ftsW::ftsW-gfp; StrR	This study
		DgpsBDdivIVA gfp-stkP	R800 rpsL1, DgpsBDdivIVA stkP::gfp-stkP; StrR	This study
		gpsB-6His	R800 rpsL1, gpsB::gpsB-6His; StrR	This study
		R6 DgpsB	R6, gpsB::kan-rpsL; KanR	This study
		RX1 DgpsB	RX1, gpsB::kan-rpsL; KanR	This study
		E. coli strains
		XL1-Blue	supE44 hsdR17 recA1 endA1 gyrA46 thi relA1 lac- F′[proAB + lacIq lacZDM15 Tn10 (TcR)]	(Bullock et al., 1987)
		BL21(DE3)	F- ompT gal dcm lon hsdSB(rB- mB-) l(DE3 [lacI lacUV5-T7 gene 1 ind1 sam7 nin5])	(Studier and Moffatt, 1986)
		BTH101	F- cya-99 araD139 galE15 galK16 rpsL1 (StrR) hsdR2 mcrA1 mcrB1	(Karimova et al., 1998)
		Plasmids
		pETPhos	pET28 derivative, encoding a His-tag for N-terminal His-tag fusions, AmpR	(Canova et al., 2008)
		pETPhos-divIVA	pETPhos derivative, encoding DivIVA, from Met1 to Lys263, AmpR	This study
		pETPhos-gpsB	pETPhos derivative, encoding GpsB, from Met1 to Phe113, AmpR	This study
		pETPhos-ezrA	pETPhos derivative, encoding EzrA, from Arg28 to Phe575, AmpR	This study
		pETPhos-ftsZ	pETPhos derivative, encoding FtsZ, from Met1 to Arg419, AmpR	This study
		pETPhos-stkP-KD-K42R	pETPhos derivative, encoding StkP inactive cytoplasmic domain, from Met1 to Arg344, AmpR	This study
		pKNT25	pSU40 derivative, encoding T25 fragment of the CyaA B. pertussis protein for C-terminal T25 fusions, KanR	(Karimova et al., 1998)
		pUT18	pUC19 derivative, encoding T18 fragment of the CyaA B. pertussis protein for C-terminal T18 fusions, AmpR	(Karimova et al., 1998)
		pKT25-zip	pKT25 derivative, encoding T25 fragment, fused to the leucine zipper region of the GCN4 yeast protein, KanR	(Karimova et al., 1998)
		pUT18C-zip	pUT18C derivative, encoding T18 fragment, fused to the leucine zipper region of the GCN4 yeast protein, AmpR	(Karimova et al., 1998)
		pKNT25-divIVA	pKNT25 derivative, encoding DivIVA from Met1 to Lys263, fused to T25, KanR	This study
		pUT18-divIVA	pUT18 derivative, encoding DivIVA from Met1 to Lys263, fused to T18, AmpR	This study
		pKNT25-gpsB	pKNT25 derivative, encoding GpsB from Met1 to Phe113, fused to T25, KanR	This study
		pUT18-gpsB	pUT18 derivative, encoding GpsB from Met1 to Phe113, fused to T18, AmpR	This study
		pKNT25-ezrA	pKNT25 derivative, encoding EzrA from Met1 to Phe575, fused to T25, KanR	This study
		pUT18-ezrA	pUT18 derivative, encoding EzrA from Met1 to Phe575, fused to T18, AmpR	This study
		pKNT25-ftsZ	pKNT25 derivative, encoding FtsZ from Met1 to Arg419, fused to T25, KanR	This study
		pUT18-ftsZ	pUT18 derivative, encoding FtsZ from Met1 to Arg419, fused to T18, AmpR	This study
		pUC57-gfp	pUC57 derivative, encoding GFP from Met1 to Lys239, AmpR	(Martin et al., 2010)
		pHK096	pJWV25 derivative, containing the rfp gene, from base +1 to base +687, AmpR, TetR	Gift from JW Veening, Groningen, The Netherlands
		pCM38	pJWV25 derivative, containing an additional restriction site AgeI upstream of the gfp+ gene, AmpR, TetR	Gift from C Morlot, Grenoble, France
		PZn-gfp	pCM38 derivative, encoding GFP from Met1 to Lys239, under control of PZn, AmpR, TetR	This study
		PZn-gfp-gpsB	PZn-gfp derivative, encoding GpsB from Met1 to Phe113, fused in C-terminal of GFP, under control of PZn, AmpR, TetR	This study
